# Supplementary material
Source: PubMed Central journal article supplement (PMC8815415)
Supplement: NIHMS1594850-supplement-3.pdf [file NIHMS1594850-supplement-3.pdf]

AURKA RNA expression (Ranked)

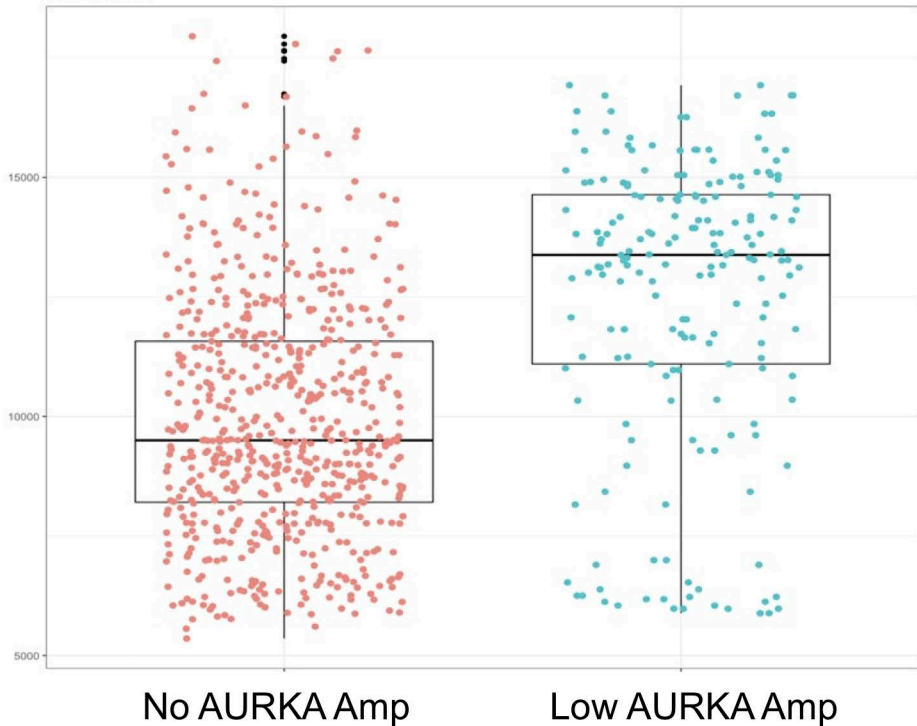

**Supplemental Figure 2. Higher AURKA expression observed even in low-amplification tumors in TCGA**

Breast tumor from the TCGA dataset were stratified based on the genomic AURKA copy number (low amplification – left, no amplification – right; high amplification excluded) and plotted against AURKA RNA expression. Higher AURKA RNA expression was observed in low AURKA-amplification compared to non-amplified tumors in these TCGA samples.
