# Supplementary material
Source: PubMed Central journal article supplement (PMC8815415)
Supplement: NIHMS1594850-supplement-4.pdf [file NIHMS1594850-supplement-4.pdf]

### **Supplemental Figure 3. Mutual Exclusivity Analysis Amongst Putative Resistance Driver Alterations**

The presence of the eight driver alterations highlighted in the manuscript is provided for each patient biopsy sample. These alterations include (alphabetically): AKT1 activation, AURKA amplification, biallelic RB1 disruption, CCNE2 amplification, ER loss (via IHC), ERBB2 activation, FGFR2 activation, and RAS activation (including HRAS, KRAS, and NRAS). For each biopsy specimen, the total number of potential driver alterations is tallied.
