# Supplementary material
Source: PubMed Central journal article supplement (PMC8815415)
Supplement: NIHMS1594850-supplement-5.pdf [file NIHMS1594850-supplement-5.pdf]

## a 552 - S

Diagnosed with T1cN1  
ER+/PR+/HER2-  
Breast Cancer

7y 1m: Osseous Metastatic  
Progression  
Bone Biopsy

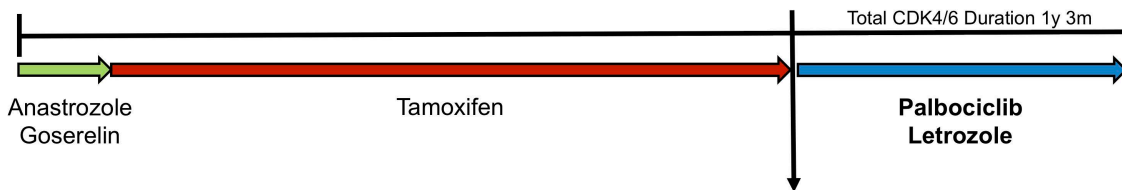

## b 376 - S

Diagnosed with TxNxM1  
ER+/PR+/HER2-  
Metastatic Breast Cancer

2m: Bone Biopsy ER+/PR+/HER2-  
4m: Breast Biopsy ER+/PR-/HER2-

AKT1 E17K

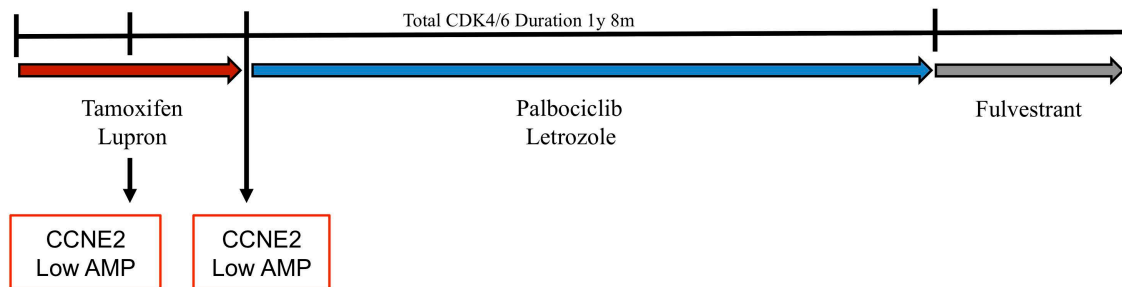

## c 387 - S

Diagnosed with Right  
Side T2N0 ER-/PR-/  
HER2+ Breast Cancer

10y: Left Side T1cNxM1  
ER+/PRx/HER2-  
Metastatic Breast  
Cancer, Breast and  
Bone Biopsy

14y:  
Breast Biopsy

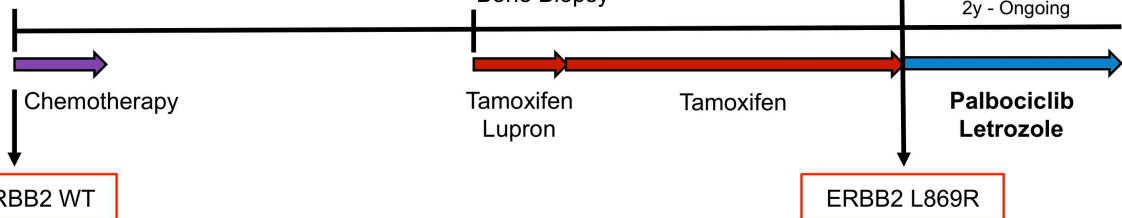

**Supplemental Figure 4. Candidate resistance mutations in representative patients – key counterexamples.**

Biopsies demonstrating CDK4/6i sensitivity despite the presence of putative resistance drivers were identified and clinical vignettes were generated. (a) A patient with bone-only metastatic progression was placed on first-line CDK4/6i and letrozole. A canonical AKT1 E17K alteration was identified at the time of metastatic progression. This patient has had stable osseous metastatic disease on interval repeat imaging and remained on treatment at the time of data cutoff. (b) A patient with de novo metastatic HR+/HER2- breast cancer was treated with tamoxifen and subsequently received palbociclib and letrozole. Prior to CDK4/6i exposure, which lasted for a duration exceeding one year, a baseline low-level amplification in CCNE2 was identified. (c) A patient was diagnosed with localized HR-/HER2+ breast cancer and treated with chemotherapy. Late metastatic relapse occurred with a new contralateral tumor, now HR+/HER2-. Following progression on tamoxifen, and prior to treatment with CDK4/6i and letrozole, an ERBB2 mutation was identified. Despite the presence of this alteration, the patient has had a durable ongoing response to CDK4/6i-based treatment.
