# Supplementary material
Source: PubMed Central journal article supplement (PMC8815415)
Supplement: NIHMS1594850-supplement-6.pdf [file NIHMS1594850-supplement-6.pdf]

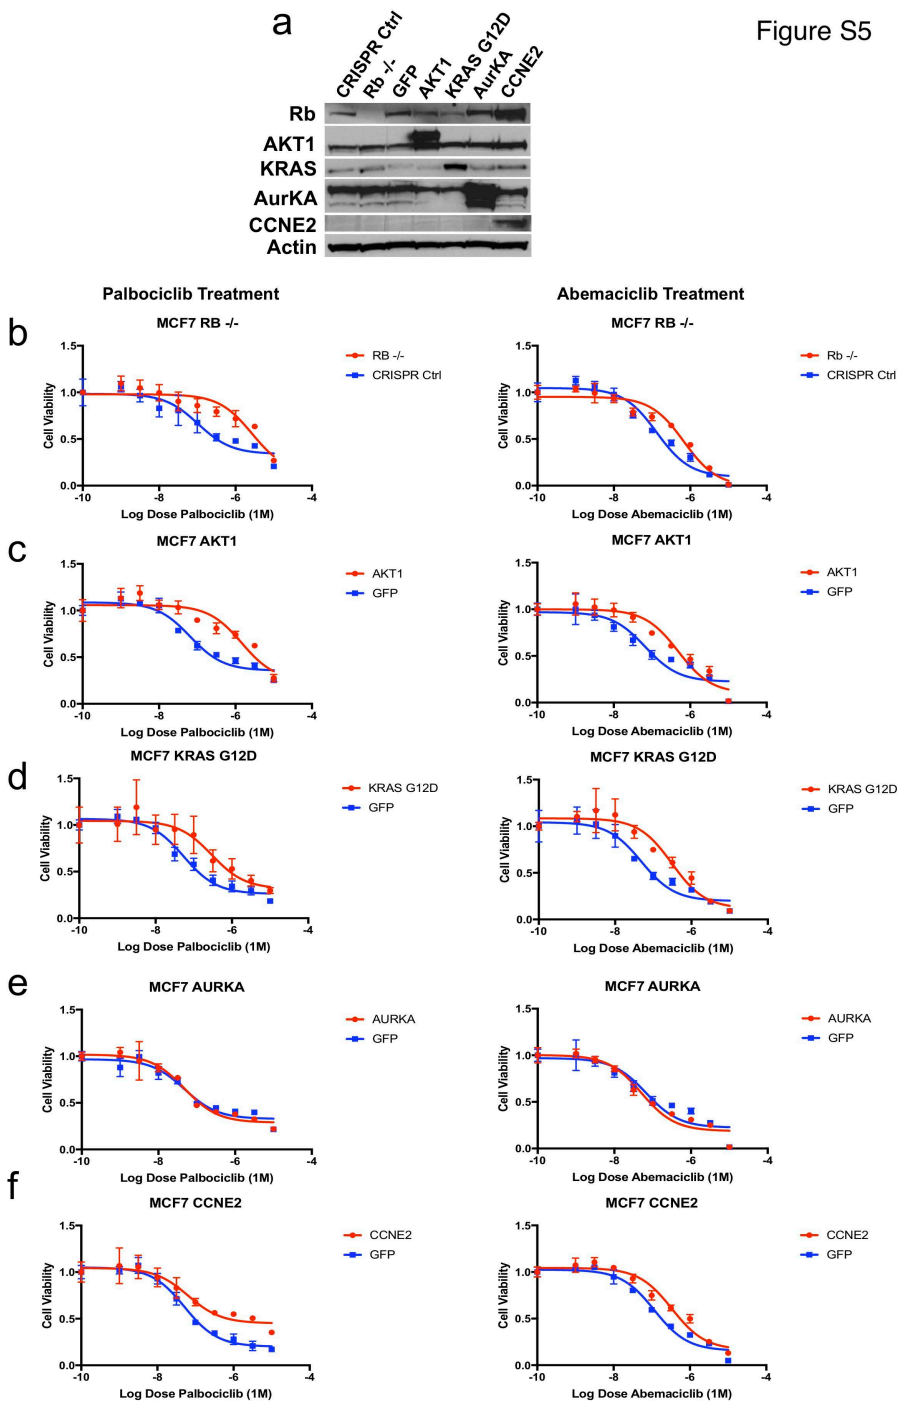

**Supplemental Figure 5. Candidate alterations provoke CDK4/6i resistance *in vitro* (MCF7).**

(a) MCF7 cells were modified via CRISPR-mediated downregulation (RB1) or lentiviral overexpression (AKT1, KRAS G12D, AURKA, CCNE2) to interrogate potential resistance mediators identified in patient biopsy samples. Western blotting with the indicated antibodies is included. (b-f) Modified MCF7 cells were exposed to escalating doses of CDK4/6i (palbociclib – left, abemaciclib – right) and viability was estimated via cell-titer-glo (CTG) assay. Control (CRISPR non-targeting guide, GFP) cells are plotted along with the resistance driver of interest (RB1 – b, AKT1 – c, KRAS G12D – d, AURKA – e, CCNE2 – f). Parental and variant cell lines are normalized to vehicle control and viability is plotted as a function of increasing CDK4/6i (graphed as triplicate average +/- standard deviation). RB1, AKT1, and CCNE2 provoke CDK4/6i resistance (to both palbociclib and abemaciclib) *in vitro* in MCF7 cells. Corresponding IC50 values are included in Supplemental Table 7.
