# Supplementary material
Source: PubMed Central journal article supplement (PMC8815415)
Supplement: NIHMS1594850-supplement-7.pdf [file NIHMS1594850-supplement-7.pdf]

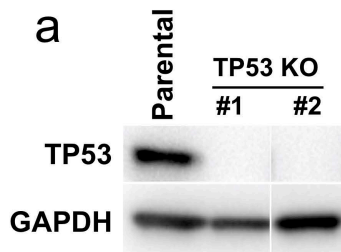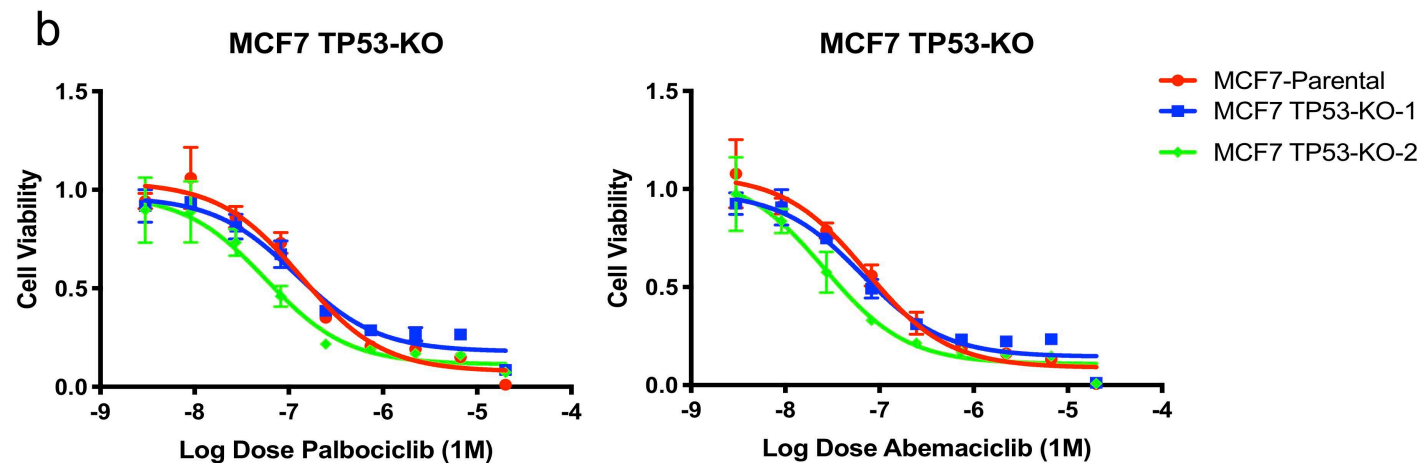

| MCF7 TP53-KO IC50 Values (uM) |          |           |           |
|-------------------------------|----------|-----------|-----------|
| Drug                          | Parental | TP53-KO-1 | TP53-KO-2 |
| Palbociclib                   | 0.1351   | 0.1186    | 0.0572    |
| Abemaciclib                   | 0.07233  | 0.06529   | 0.02625   |

**Supplemental Figure 6. TP53 knockout does not alter CDK4/6i sensitivity in MCF7.**

TP53 expression was prevented in MCF7 cells via CRISPR knockout (a); two knockout constructs are demonstrated (KO-1 and KO-2). MCF7 cells lacking TP53 did not demonstrate resistance to palbociclib (b, LEFT) or abemaciclib (b, RIGHT). Cell viability is graphed in triplicate for each construct and dose with standard deviation. IC50 values for each cell line/drug combination are included.
