# Supplementary material
Source: PubMed Central journal article supplement (PMC8815415)
Supplement: NIHMS1594850-supplement-9.pdf [file NIHMS1594850-supplement-9.pdf]

# MDA-MB-361-AR-1 (*KRAS*<sup>G12V</sup>) v. Parental

Figure S8

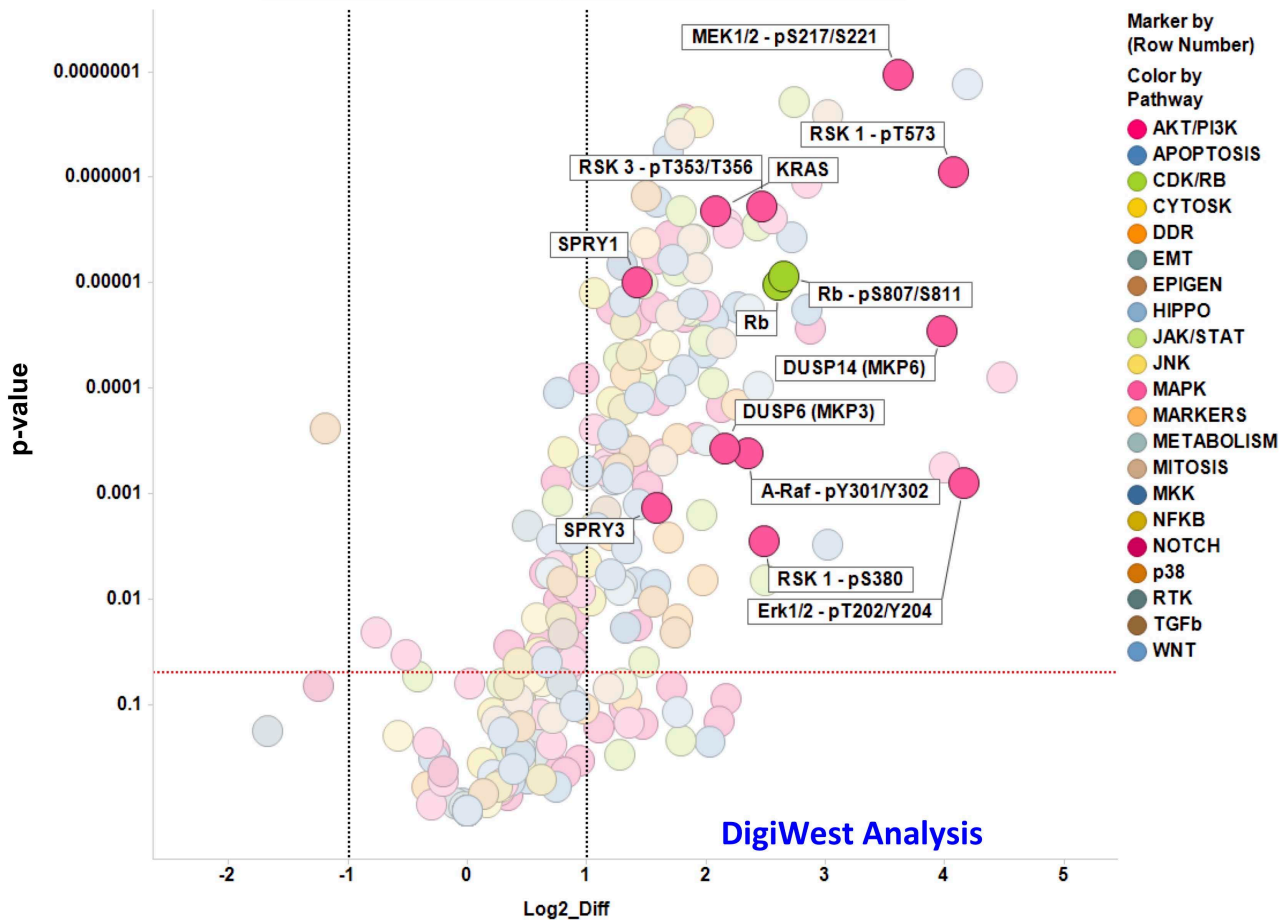

**Supplemental Figure 8. MDA-MB-361-AR-1 demonstrates upregulation of RAS-ERK pathway effectors via proteomic analysis.**

Digiwest proteomic analysis of MDA-MB-361-AR-1 cells versus parental MDA-MB-361 cells demonstrates increased activation of multiple RAS-pathway effectors including KRAS, MEK, and ERK. These results suggest that the upregulation in pERK noted via western blot analysis correlates with pathway activation in the derivative cells.
