# Supplementary material
Source: PubMed Central journal article supplement (PMC8815415)
Supplement: NIHMS1594850-supplement-10.pdf [file NIHMS1594850-supplement-10.pdf]

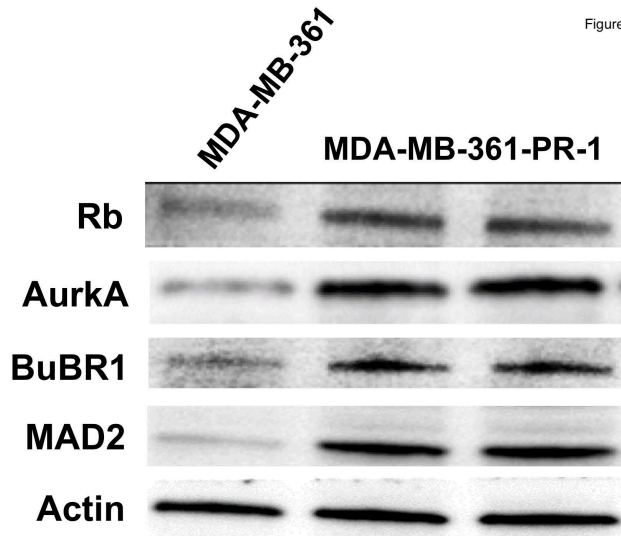

**Supplemental Figure 9. Mitotic checkpoint complex protein expression is increased in AURKA amplified 361-PR-1 derivative cells.**

Western blot demonstrating relative RB1 and AURKA protein expression in MDA-MB-361 parental cells as compared to MDA-MB-361-PR-1 derivative cells (with increased AURKA expression). Two replicates of the 361-PR-1 cells are provided at RIGHT. 361-PR-1 cells also demonstrate increased expression of BuBR1 and MAD2, two proteins implicated in the mitotic checkpoint. Prior work in a lung cancer cellular model has suggested that increased activity and expression of the mitotic checkpoint components occurs due to increased AURKA activity, priming cells for spindle assembly, mitotic exit, and increased cell division.
