# Supplementary material
Source: PubMed Central journal article supplement (PMC8815415)
Supplement: NIHMS1594850-supplement-11.pdf [file NIHMS1594850-supplement-11.pdf]

**a** Apoptotic Cell Fraction – 48H CHK1i Treatment

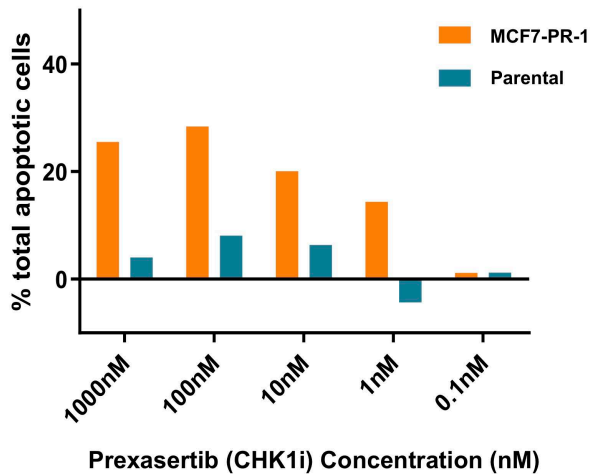

|        | MCF7-PR-1 | Parental |
|--------|-----------|----------|
| 1000nM | 25.54     | 4.02     |
| 100nM  | 28.38     | 8.11     |
| 10nM   | 20.09     | 6.38     |
| 1nM    | 14.37     | -4.31    |
| 0.1nM  | 1.17      | 1.2      |

**b** Apoptotic Cell Fraction – 72H CHK1i Treatment

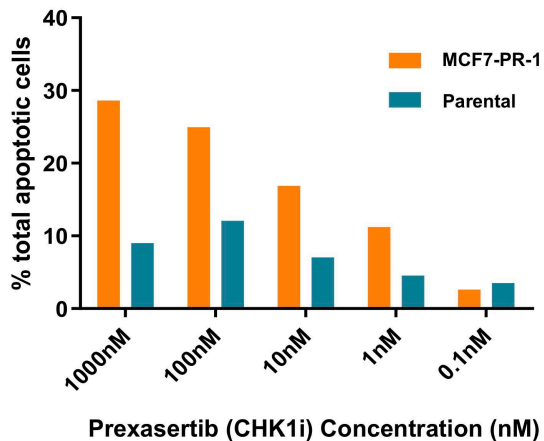

|        | MCF7-PR-1 | Parental |
|--------|-----------|----------|
| 1000nM | 28.6      | 9.01     |
| 100nM  | 24.96     | 12.07    |
| 10nM   | 16.88     | 7.04     |
| 1nM    | 11.23     | 4.55     |
| 0.1nM  | 2.62      | 3.53     |

**Supplemental Figure 10. CCNE2-expressing MCF7-PR-1 cells demonstrate increased apoptosis with CHK1 inhibitor treatment.**

Parental MCF7 and derivative MCF7-PR-1 cells (expressing high CCNE2) were treated with increasing doses of prexasertib (CHK1i). The apoptotic cell fraction (assessed via Annexin V-FITC Apoptosis Detection Assay) was measured relative to a DMSO control and plotted as a function of CHK1i dose. Results are provided for both 48 hours (a) and 72 hours (b) of drug treatment (raw data is provided at RIGHT).
